# Supplementary material for: A nanosized metal–organic framework of Fe-MIL-88NH2 as a novel peroxidase mimic used for colorimetric detection of glucose
Source: Royal Society of Chemistry journal article supplement (doi:10.1039/c3an00560g), 2013-01-01
Supplement: c3an00560g.pdf [file c3an00560g.pdf]

## Supplementary Information

*for*

# Nanosized metal–organic framework of Fe-MIL-88NH<sub>2</sub> as a novel peroxidase mimic and used for colorimetric detection of glucose

Ya Li Liu,<sup>a</sup> Xi Juan Zhao,<sup>a</sup> Xiao Xi Yang<sup>b</sup> and Yuan Fang Li<sup>\* a</sup>

<sup>a</sup> *Education Ministry Key Laboratory on Luminescence and Real-Time Analysis, School of*

*Chemistry and Chemical Engineering, Southwest University, Chongqing 400715, China. E-mail:*

*liyf@swu.edu.cn, Tel: (+86) 23 68254659, Fax: (+86) 23 68367257.*

<sup>b</sup> *College of Pharmaceutical Science, Southwest University, Chongqing 400716, China*

## Experimental section

**Peroxidase-like activity measurements.** To examine the capability of Fe-MIL-88NH<sub>2</sub> MOF as catalyst for the oxidation of TMB, kinetic measurements were carried out in time course mode by monitoring the absorbance change at 650 nm. Experiments were performed using 0.04 mg/mL Fe-MIL-88NH<sub>2</sub> MOF in 50 µL 0.2 M NaAc buffer solution (pH 4, 45 °C) with fixed concentration of H<sub>2</sub>O<sub>2</sub> (1mM) and varying concentration of TMB from 0.1 to 1.5 mM. Similarly, the kinetic analyses with H<sub>2</sub>O<sub>2</sub> as the substrate were performed using 0.04 mg/mL of Fe-MIL-88NH<sub>2</sub> MOF with fixed concentration of TMB (1mM) and varying concentration of H<sub>2</sub>O<sub>2</sub> from 1-30 mM. Apparent kinetic parameters were calculated on the basis of the Michaelis–Menten equation(eqs. 1).<sup>1</sup>

$$V_0 = V_{\max}[S]/[S] + K_m \quad (\text{eqs. 1})$$

$V_0$  is the initial catalytic rate,  $V_{\max}$  is the maximum rate conversion, which is obtained when the catalytic sites on the enzyme are saturated with substrate,  $[S]$  is the substrate concentration, and  $K_m$  is the apparent Michaelis–Menten equation. Maximum initial velocity ( $V_{\max}$ ) and Michaelis–Menten constant ( $K_m$ ) were obtained using Lineweaver–Burk plots.<sup>2</sup>

Absorption values obtained by timescan mode at 650 nm were converted to the concentration of TMB derived oxidation products by the Beer- Lambert Law (eqs. 2), in which  $A$  is the absorption at 650 nm,  $b$  is the optical length of 1.0 cm,  $\epsilon$  and  $c$  are the molar absorption coefficient of 39000 M<sup>-1</sup>cm<sup>-1</sup> and concentration for TMB derived oxidation products,<sup>2</sup> respectively.

$$A = \epsilon bc \quad (\text{eqs. 2})$$

**Electron spin resonance (ESR) measurements.** The ESR signal was measured by a Bruker ESP 300E (X-band) spectrometer with microwave bridge (receiver gain,  $1 \times 10^5$ ; modulation amplitude, 2 Gauss; microwave power, 10 mW; modulation frequency, 100 kHz). Samples solution were obtained at room temperature by adding 50  $\mu\text{L}$  of 0.2 M NaAc buffer (pH=4.0), 5  $\mu\text{L}$  of 30%  $\text{H}_2\text{O}_2$ , and 20  $\mu\text{L}$  DMPO and 50  $\mu\text{L}$  of 1.0 mg/mL Fe-MIL-88NH<sub>2</sub> MOF ultra-pure water into a 1 mL plastic tube. Then this sample solution was transferred to a quartz capillary tube and placed in the ESR cavity. Under the UV-irradiation at 355 nm, EPR signal was detected.

**Cell viability assays.** The  $2 \times 10^6$  cells / ml A549 cell in Minimal Essential Medium supplemented with 2 % fetal bovine serum was added to each well of a 96-well plate (100  $\mu\text{L}$ /well). The cells were cultured first for 24 h in an incubator (37 °C, 5%  $\text{CO}_2$ ), and for another 24 h, the culture medium was replaced with 100 $\mu\text{L}$  of MEM containing (1) 10 $\mu\text{L}$  of different doses of Fe-MIL-88NH<sub>2</sub> MOF (0.2, 0.4, 0.6, 0.8, 1.0 mg/mL); (2) 10  $\mu\text{L}$  of different concentration of  $\text{H}_2\text{O}_2$  (0.8, 1, 2, 5, 8 mM); (3) 10  $\mu\text{L}$  of 0.2 mg/mL Fe-MIL-88 NH<sub>2</sub> MOF and 10 $\mu\text{L}$  of different concentration of  $\text{H}_2\text{O}_2$  (0.8, 1, 2, 5, 8 mM). Followed by removing the culture medium, 10 $\mu\text{L}$  of CCK-8 solution was added to every cell well which was washed with PBS buffer twice and contained MEM (2% fetal bovine serum) 90  $\mu\text{L}$ . The cells were further incubated for 1 h. The optical density (OD) of the mixture was measured at 450 nm with a Microplate Reader Model. The cell viability was estimated according to the following equation:

$$\text{Cell viability [\%]} = (\text{OD sample} - \text{OD blank}) / (\text{OD control} - \text{OD blank}) \times 100\%$$

## Additional figures

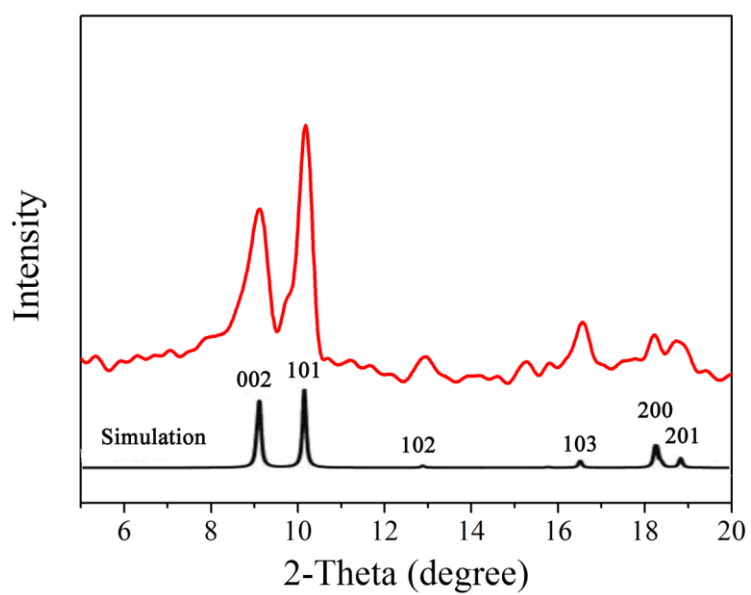

**Fig. S1** Powder XRD patterns for Fe-MIL-88NH<sub>2</sub> MOF (red), the simulated XRD pattern for the MIL-88 (Cr) structure (black) created from reference documents.<sup>3</sup>

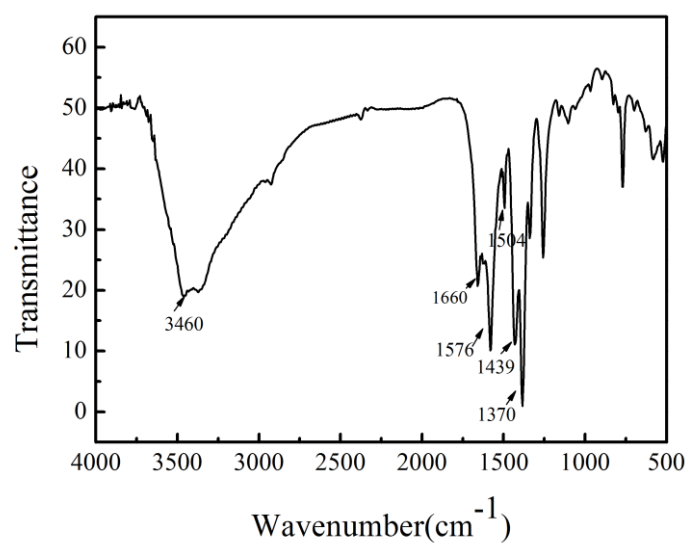

**Fig. S2** FTIR spectra of Fe-MIL-88NH<sub>2</sub> nanocrystals

The Fourier transform infrared (FTIR) spectroscopy shows the similar characteristic bands with reference documents.<sup>4, 5</sup>

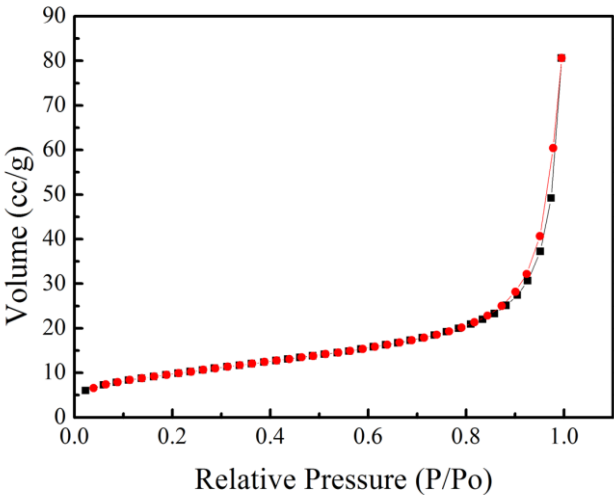

**Fig. S3** N<sub>2</sub> adsorption/desorption isotherms of Fe-MIL-88NH<sub>2</sub> nanocrystals at 77 K.

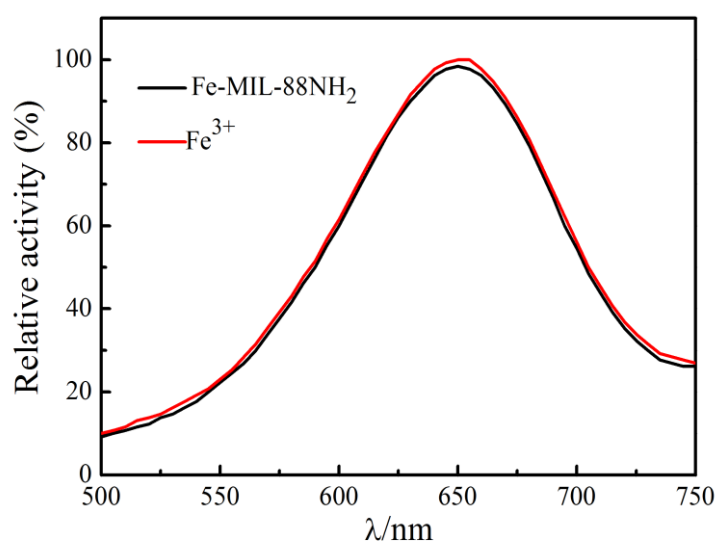

**Fig. S4** The catalytic activity of Fe-MIL-88NH<sub>2</sub> MOF and Fe<sup>3+</sup> ion in this reaction.

Condition: incubated at 45 °C in 50 μL of 0.2 M pH 4.0 NaAc buffer (TMB, 1 mM;

H<sub>2</sub>O<sub>2</sub>, 50 μM; Fe-MIL-88NH<sub>2</sub>, 0.02 mg/mL, Fe<sup>3+</sup> 7.5×10<sup>-5</sup> M ) for 20 min.

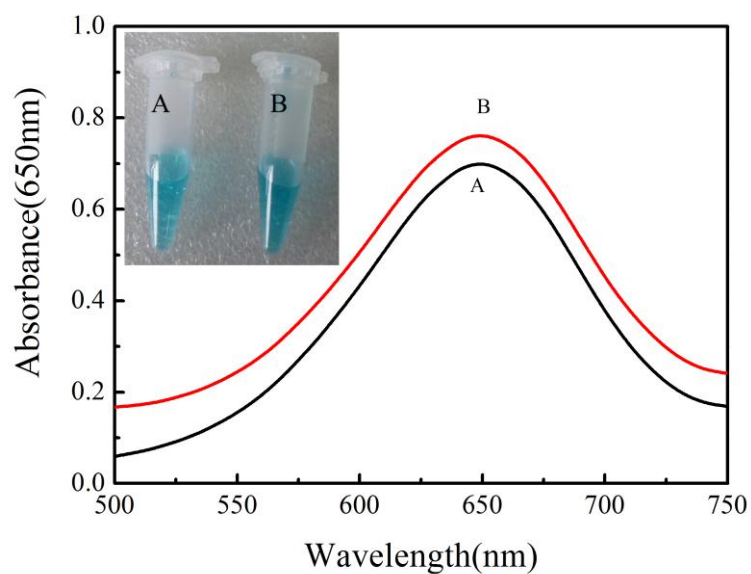

**Fig. S5.** Demonstration that peroxidase-like activity of Fe-MIL-88NH<sub>2</sub> MOF activity does not result from iron leaching. (A) TMB+H<sub>2</sub>O<sub>2</sub>+re-dispersed; (B) TMB+H<sub>2</sub>O<sub>2</sub>+Fe-MIL-88NH<sub>2</sub>; Fe-MIL-88NH<sub>2</sub> was first incubated in NaAc buffer (pH 4.0) for 20 min, and then centrifuged at 15000 rpm for 30 min, the precipitate was again re-dispersed using ultrapure water. The activity of the re-dispersed solution was then compared to that of the intact Fe-MIL-88NH<sub>2</sub> MOF, incubated at 45 °C in 50 µL of 0.2 M pH 4.0 NaAc buffer (TMB, 1 mM; H<sub>2</sub>O<sub>2</sub>, 50µM; Fe-MIL-88NH<sub>2</sub>, 0.04 mg/mL) for 20 min. Inset is the photograph.



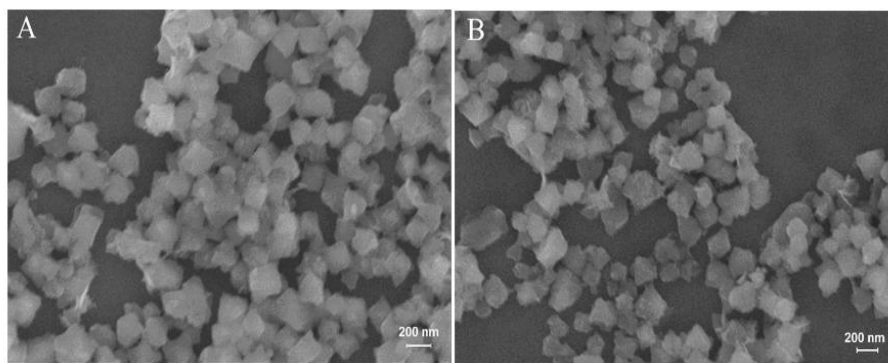

**Fig. S6** SEM image of Fe-MIL-88NH<sub>2</sub> nanoparticles before (A) and after (B) the catalytic reaction.

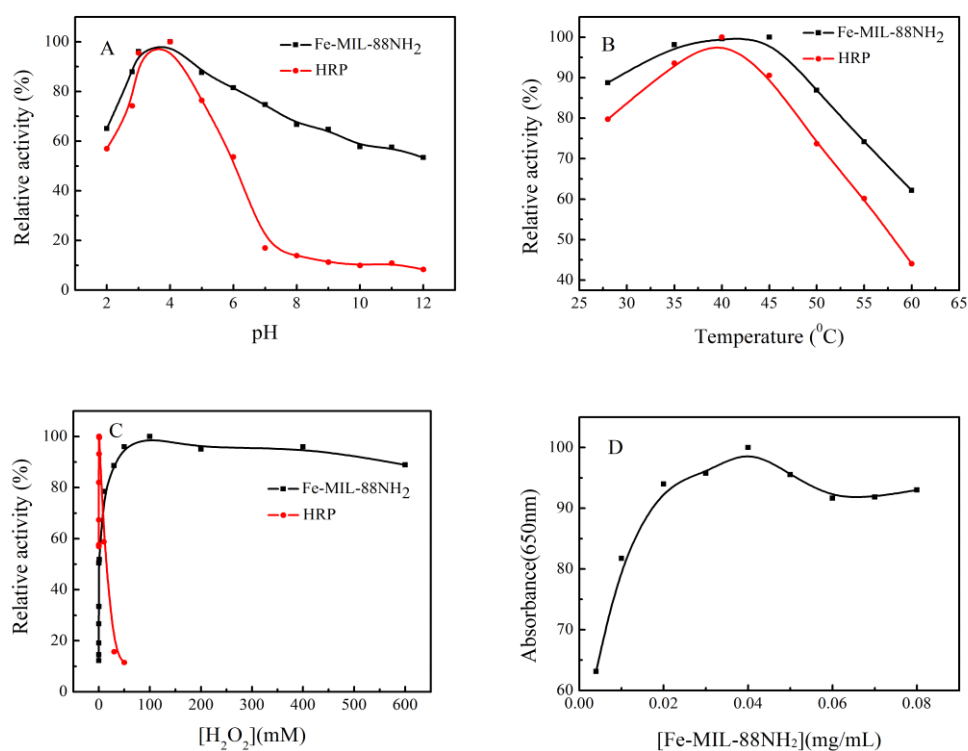

**Fig. S7** Dependency of the Fe-MIL-88NH<sub>2</sub> MOF peroxidase-like activity on (A) pH ; (B) temperature; (C) H<sub>2</sub>O<sub>2</sub> concentration and (D) Fe-MIL-88NH<sub>2</sub> MOF concentration; (A) Experiments were carried out using 0.04 mg/mL Fe-MIL-88NH<sub>2</sub> or 1.25 µg/mL HRP in 50 µL 0.2 M NaAc buffer (pH 2-12) with 1mM TMB and 50 µM H<sub>2</sub>O<sub>2</sub> at 45 °C for 20min. (B) 0.04 mg/mL Fe-MIL-88NH<sub>2</sub> or 1.25 µg/mL HRP in 50 µL 0.2 M NaAc buffer (pH 4.0) with 1mM TMB and 50 µM H<sub>2</sub>O<sub>2</sub> were incubated in different temperature( 28-60 °C) for 20min. (C) Various concentrations of H<sub>2</sub>O<sub>2</sub> were incubated in 50 µL 0.2 M NaAc buffer (pH 4.0) at 45 °C for 20min with 1mM TMB and 0.04 mg/mL Fe-MIL-88NH<sub>2</sub> or 1.25 µg/mL HRP. (D) The peroxidase activity was determined using the Fe-MIL-88NH<sub>2</sub> concentration ranging from 0.004 up to 0.08 mg/mL, 50 µL 0.2 M NaAc buffer (pH 4.0), 1mM TMB and 50 µM H<sub>2</sub>O<sub>2</sub> were added to the reaction The maximum point in each curve was set as 100 %.

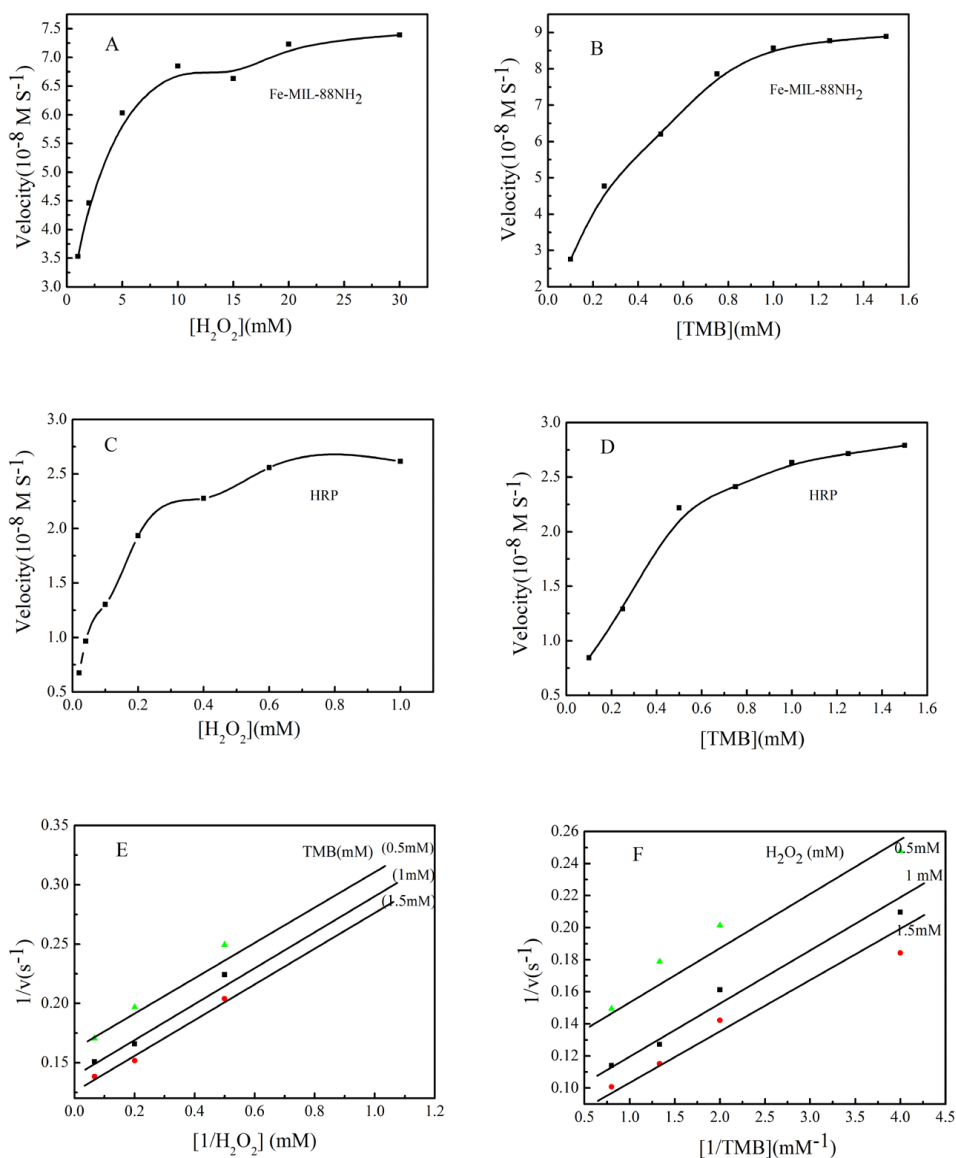

**Fig. S8** Steady-state kinetic assay of Fe-MIL-88NH<sub>2</sub> MOF. The velocity of the reaction was measured using 0.04 mg/mL Fe-MIL-88NH<sub>2</sub> MOF (A, B) or 1.25  $\mu\text{g/mL}$  HRP (C, D) in 50  $\mu\text{L}$  0.2 M NaAc buffer (pH 4.0) at 45  $^{\circ}\text{C}$ . (E), (F) Double-reciprocal plots of activity of Fe-MIL-88NH<sub>2</sub> MOF at a fixed concentration of one substrate versus varying concentration of the second substrate for  $\text{H}_2\text{O}_2$  and TMB.

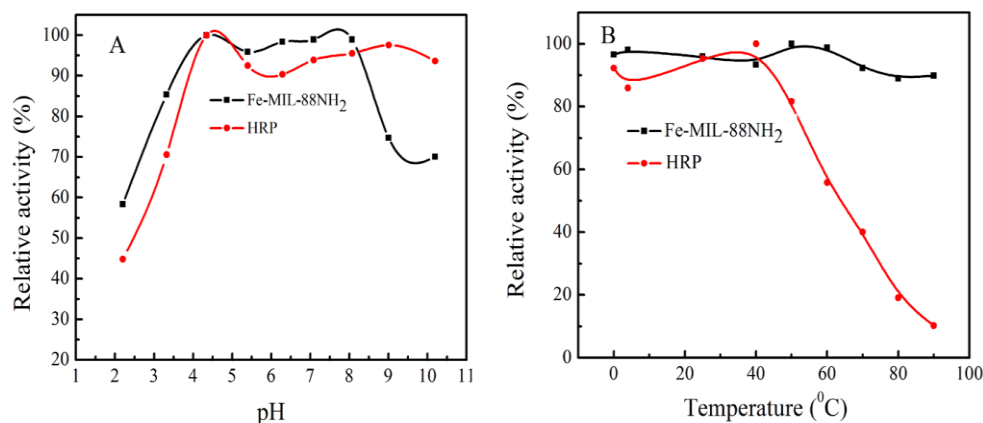

**Fig. S9** Comparison of the stability of Fe-MIL-88NH<sub>2</sub> MOF and HRP. (A) Fe-MIL-88NH<sub>2</sub> MOF and HRP were first incubated at pH 2–10 for 1 h and then their peroxidase activities were measured under standard conditions. (B) Fe-MIL-88NH<sub>2</sub> MOF and HRP were first incubated at 0–90 °C for 1 h and then the peroxidase activity was measured under standard conditions. (TMB, 1 mM; Fe-MIL-88NH<sub>2</sub>, 0.04 mg/mL; HRP, 1.25 µg/mL; 50 µL 0.2 M pH 4.0 NaAc buffer at 45 °C; incubation 20 min). The maximum point in each curve was set as 100 %.

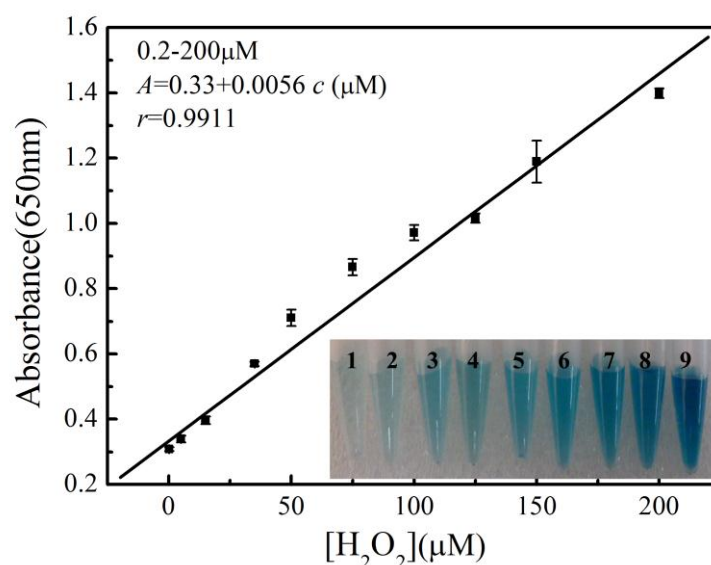

**Fig. S10** The response curves of H<sub>2</sub>O<sub>2</sub>. Error bars represent the standard deviation for three measurements. Inset: Images of colored products for different concentrations of H<sub>2</sub>O<sub>2</sub> (1-9). (TMB, 1mM; Fe-MIL-88NH<sub>2</sub>, 0.04 mg/mL; NaAc buffer, 50 μL 0.2M); incubation 20 min in pH 4.0 NaAc buffer at 45 °C.

## References

1. W. W. He, Y. Liu, J. S. Yuan, J. J. Yin, X. C. Wu, X. N. Hu, K. Zhang, J. B. Liu, C. Y. Chen, Y. L. Ji and Y. T. Guo, *Biomaterials*, 2011, **32**, 1139
2. A. K. Dutta, S. K. Maji, D. N. Srivastava, A. Mondal, P. Biswas, P. Paul and B. Adhikary, *ACS Appl. Mater. Interfaces*, 2012, **4**, 1919
3. S. Surblé, C. Serre, C. Mellot-Draznieks, F. Millange and G. Férey, *Chem. Commun.*, 2006, 284.
4. M. H. Pham, G. T. Vuong, A. T. Vu and T. O. Do, *Langmuir*, 2011, **27**, 15261.
5. T. Z. Zhang, Y. Lu, Y. G. Li, Z. M. Zhang, W. L. Chen, H. Fu and E. B. Wang, *Inorg. Chim. Acta*, 2012, **384**, 219.
